# Supplementary material
Source: HighWire-hosted journal article supplement (https://jnm.snmjournals.org/highwire/filestream/94533/field_highwire_adjunct_files/0/129098_Supplememental_Data.pdf)
Supplement: 129098_Supplememental_Data.pdf [file 129098_Supplememental_Data.pdf]

SUPPLEMENTAL TABLE 1: Overview of PET/MR imaging systems described in literature

| Short name | Company/university | Year                                           | Usage* | MR field strength (T) | Scintillator† | Detector technology‡ | Crystal rings  | Blocks/ ring | Crystal block | Crystal size (mm <sup>3</sup> ) | Axial FOV (cm) | Transaxial FOV (cm) | Spatial resolution (mm) | Sensitivity (%) | Timing resolution (ns) | Energy resolution (%) | Reference   |         |
|------------|--------------------|------------------------------------------------|--------|-----------------------|---------------|----------------------|----------------|--------------|---------------|---------------------------------|----------------|---------------------|-------------------------|-----------------|------------------------|-----------------------|-------------|---------|
| 1          | "McPET I"          | University of California Los Angeles, CA (US)  | 1997   | P-R-Sim               | 0.2           | LSO                  | MC-PMT/ fibers | 1            | 48            | 16§                             | 2x2x10         | 1.0                 | <3.8                    | 2.1             | N.A.                   | 20                    | 41%         | (1)     |
| 2          | "McPET II"         | University of California Los Angeles, CA (US)  | 1997   | P-R-Sim               | 0.2 and 9.4   | LSO                  | MC-PMT/ fibers | 1            | 72            | 24§                             | 2x2x5          | 0.2                 | <5.4                    | 2.1             | N.A.                   | 26                    | 45%         | (2)     |
| 3          | Kings              | Kings College London (UK)                      | 2005   | P-R-Sim               | 3             | LSO                  | PSPMT/ fibers  | 1            | 8             | 1x4x4                           | 2x3x5          | 0.3                 | 5.6                     | 1.4-3.2         | 0.95                   | 20.9                  | 70%         | (3)     |
| 4          | Split Magnet       | University of Cambridge Cambridge (UK)         | 2006   | P-R-Sim               | 1             | LSO                  | PSPMT/ fibers  | 48           | 24            | 12x12                           | 1.52x1.52x10   | 7.2                 | <14.7                   | 1.6             | 3.6                    | 3.6                   | 27%         | (4)     |
| 5          | West Virginia      | West Virginia University Morgantown, WV (US)   | 2007   | P-R-Sim               | 3             | LSO                  | PSPMT/ fibers  | 20           | 2             | 20x20                           | 2.5x2.5x15     | 5.0                 | 8.0                     | 2.65            | N.A.                   | N.A.                  | 85%         | (5)     |
| 6          | Kobe City I        | Kobe City College of Technology, Kobe (JP)     | 2009   | P-R-Sim               | 0.15          | MLS                  | PSPMT/ fibers  | 3            | 32            | 2x2x2                           | 2.5x3.5x3.5    | 0.5                 | N.A.                    | 2.8-3.0         | 0.25                   | 6                     | 29%/50%     | (6)     |
| 7          | Fieldcycled        | Western Ontario London, ON (CA)                | 2009   | P-R-Seq               | 0.30          | BGO                  | PSPMT/ fibers  | 8            | 2             | 8x8                             | 6.2x5.6x30     | -5.0                | N.A.                    | N.A.            | N.A.                   | N.A.                  | N.A.        | (7)     |
| 8          | Kobe City II       | Kobe City College of Technology, Kobe (JP)     | 2010   | P-R-Sim               | 0.30          | LGSO                 | PSPMT/ fibers  | 11           | 16            | 11x9x2                          | 1.9x2.2x6/7    | 2.1                 | 8.0                     | 2.4-2.9         | 1.5                    | 5                     | 40%         | (8)     |
| 9          | Nagoya             | Nagoya University Nagoya (JP)                  | 2012   | P-R-Sim               | 0.30          | LGSO                 | PSPMT/ fibers  | 13           | 16            | 11x13x2                         | 0.9x1.3x5/6    | 2.1                 | 5.6                     | 1.2             | 1.5                    | 3.1                   | 24%         | (9)     |
| 10         | "nanoScan"         | Mediso Ltd. Budapest (HU)                      | 2013   | P-Co-Seq              | 1             | LYSO                 | PSPMT          | 81           | 12            | 39x81                           | 1.12x1.12x13   | 9.4                 | 4.5/9.4/12.0            | 1.5-2.1         | 8.4                    | N.A.                  | N.A.        | (10)    |
| 11         | UCD                | University of California Davis, CA (US)        | 2006   | P-R-Sim               | 7             | LSO                  | PSAPD/ fibers  | 8            | 16            | 8x8                             | 1.43x1.43x6    | 1.2                 | 3.5                     | 1.1-1.7         | 0.35                   | 2.5-7.5               | 25±5.5%     | (11)    |
| 12         | Tübingen I         | University of Tübingen Tübingen (DE)           | 2007   | P-R-Sim               | 7             | LSO                  | APD            | 12           | 10            | 12x12                           | 1.6x1.6x4.5    | 1.9                 | 4.0                     | 1.9             | 0.23                   | 8                     | 14.6%-29.9% | (12)    |
| 13         | "ratCap"           | Brookhaven National Laboratory, Upton, NY (US) | 2011   | P-R-Sim               | 9.4           | LSO                  | APD            | 8            | 12            | 4x8                             | 2.2x2.2x5      | 1.8                 | 3.8                     | 1.2             | 0.3                    | 13.9                  | 13%         | (13)    |
| 14         | Tübingen II        | University of Tübingen Tübingen (DE)           | 2013   | P-R-Sim               | 7             | LSO                  | APD            | 45           | 16            | 15x15                           | 1.5x1.5x10     | 7.2                 | 7.2                     | >1.5            | N.A.                   | N.A.                  | N.A.        | (14)    |
| 15         | Sogang I           | Sogang University Seoul (KR)                   | 2011   | P-R-Sim               | 3             | LYSO                 | SiPM           | 4            | 16            | 4x4                             | 3x3x10         | 1.3                 | <7.0                    | 2.8-4.1         | 0.65                   | 1.5                   | 17.6%       | (15)    |
| 16         | Seoul              | Seoul National University, Seoul (KR)          | 2012   | P-R-Sim               | 3             | LGSO                 | SiPM           | 20           | 12            | 20x18                           | 1.5x1.5x7      | 3.2                 | 13.6                    | 1.0-1.5         | 0.12                   | 1.23                  | 14%         | (16)    |
| 17         | RWTH               | RWTH Aachen Aachen (DE)                        | 2012   | P-R-Sim               | 3             | LYSO                 | SiPM/ digital  | 22           | 10            | 22x22                           | 1.3x1.3x10     | 3.0                 | 16.0                    | 2.2             | 0.6                    | N.A.                  | 12.9%       | (17)    |
| 18         | Eulji              | Eulji University Gyeonggi (KR)                 | 2012   | P-R-Sim               | 3             | LYSO                 | SiPM fibers/   | 6            | 12            | 6x6                             | 2.47x2.74x20   | N.A.                | N.A.                    | N.A.            | N.A.                   | 2                     | 18%         | (18)    |
| 19         | Kobe City III      | Kobe City College of Technology, Kobe (JP)     | 2012   | P-R-Sim               | 0.15          | LGSO                 | SiPM phoswich  | 11           | 16            | 11x9x2                          | 1.1x1.2x5/6    | 13.2                | 8.0                     | 1.6             | 0.6                    | 3.1                   | 27%         | (19)    |
| 20         | Sogang II          | Sogang University Seoul (KR)                   | 2013   | P-R-Sim               | 3             | LYSO                 | SiPM           | 4            | 72            | 4x4                             | 3x3x20         | 12.9                | 25.0                    | 3.1-6.6         | 0.33                   | 4.2                   | 18.1%       | (20)    |
| 22         | "Ingenuity"        | Koninklijke Philips NV Eindhoven (NL)          | 2011   | C-Co-Seq              | 3             | LYSO                 | PMT            | 44           | 28            | 23x44                           | 4x4x22         | 18                  | 60                      | 4.6-5.3         | 0.7                    | 0.52                  | 11.6%       | (21)    |
| 21         | "brainPET"         | Siemens AG München (DE)                        | 2008   | C-R-Sim               | 3 and 9.4     | LSO                  | APD            | 72           | 32            | 12x12                           | 2.5x2.5x20     | 19.3                | 32                      | 1.8-6.4         | 7.2                    | 4.9                   | 17.1%       | (22,23) |
| 23         | "mMR"              | Siemens AG München (DE)                        | 2012   | C-Co-Sim              | 3             | LSO                  | APD            | 64           | 56            | 8x8                             | 4x4x20         | 25.8                | 59.4                    | 4.3-6.6         | 1.5                    | 2.93                  | 14.5%       | (24)    |
| 24         | GE¶                | GE Healthcare Waukesha, WI (US)                | 2014   | C-Co-Sim              | 3             | LYSO                 | SiPM           | 45           | 112           | 4x9                             | 3.95x5.3x25    | 25                  | 60                      | 3.9             | 2.4                    | 0.40                  | 10.5%       | (25)    |

\*Code specifying the field (P: preclinical, C: clinical), the status (R: research, Co: commercial) and operation (Sim: simultaneous, Seq: sequential).

†Abbreviations: BGO: bismuth germanate; LGSO: lutetium gadolinium oxyorthosilicate; LSO: lutetium oxyorthosilicate; LYSO: lutetium yttrium oxyorthosilicate; MLS: mixed lutetium silicates.

‡Abbreviations: APD: avalanche photodiode; MC: multichannel; PMT: photomultiplier tube; PS: position sensitive; SiPM: silicon photomultiplier.

§Describes the number of crystals per MC-PMT.

|| A variant of the ratCap has recently been introduced commercially by MR Solutions Ltd.

¶This scanner has been presented at the RSNA and SNM conferences but is not yet commercially available.

## REFERENCES

1. Shao Y, Cherry SR, Farahani K, et al. Simultaneous PET and MR imaging. *Phys Med Biol.* 1997;42:1965–1970.
2. Shao Y, Cherry SR, Farahani K, et al. Development of a PET detector system compatible with MRI/NMR systems. *IEEE Trans Nucl Sci.* 1997;44:1167–1171.
3. Mackewn JE, Halsted P, Charles-Edwards G, et al. Performance evaluation of an MRI-compatible pre-clinical PET system using long optical fibers. *IEEE Trans Nucl Sci.* 2010;57:1052–1062.
4. Hawkes RC, Fryer TD, Siegel S, Ansorge RE, Carpenter TA. Preliminary evaluation of a combined microPET-MR system. *Technol Cancer Res Treat.* 2010;9:53–60.
5. Raylman RR, Majewski S, Velan SS, et al. Simultaneous acquisition of magnetic resonance spectroscopy (MRS) data and positron emission tomography (PET) images with a prototype MR-compatible, small animal PET imager. *J Magn Reson.* 2007;186:305–310.
6. Yamamoto S, Hatazawa J, Imaizumi M, et al. A multi-slice dual layer MR-compatible animal PET system. *IEEE Trans Nucl Sci.* 2009;56:2706–2713.
7. Bindseil GA, Gilbert KM, Scholl TJ, Handler WB, Chronik BA. First image from a combined positron emission tomography and field-cycled MRI system. *Magn Reson Med.* 2011;66:301–305.
8. Yamamoto S, Imaizumi M, Kanai Y, et al. Design and performance from an integrated PET/MRI system for small animals. *Ann Nucl Med.* 2010;24:89–98.
9. Yamamoto S, Watabe H, Kanai Y, et al. Development of a flexible optical fiber based high resolution integrated PET/MRI system. *Med Phys.* 2012;39:6660–6671.
10. Nagy K, Tóth M, Major P, et al. Performance evaluation of the small-animal nanoScan PET/MRI system. *J Nucl Med.* 2013;54:1825–1832.
11. Wu Y, Catana C, Farrell R, et al. PET performance evaluation of an MR-compatible PET insert. *IEEE Trans Nucl Sci.* 2009;56:574–580.
12. Judenhofer MS, Wehrl HF, Newport DF, et al. Simultaneous PET-MRI: a new approach for functional and morphological imaging. *Nat Med.* 2008;14:459–465.
13. Maramraju SH, Smith SD, Junnarkar SS, et al. Small animal simultaneous PET/MRI: initial experiences in a 9.4 T microMRI. *Phys Med Biol.* 2011;56:2459–2480.
14. Wehrl HF, Hossain M, Lankes K, et al. Simultaneous PET-MRI reveals brain function in activated and resting state on metabolic, hemodynamic and multiple temporal scales. *Nat Med.* 2013;19:1184–1189.
15. Kang J, Choi Y, Hong KJ, et al. A small animal PET based on GAPDs and charge signal transmission approach for hybrid PET-MR imaging. *J Instrum.* 2011;6:08012–P08012.
16. Yoon HS, Ko GB, Kwon SI, et al. Initial results of simultaneous PET/MRI experiments with an MRI-compatible silicon photomultiplier PET scanner. *J Nucl Med.* 2012;53:608–614.
17. Wehner J, Weissler B, Dueppenbecker P, et al. PET/MRI insert using digital SiPMs: investigation of MR-compatibility. *Nucl Instrum Meth A.* 2014;734:116–121.
18. Hong SJ, Kang HG, Ko GB, Song IC, Rhee J-T, Lee JS. SiPM-PET with a short optical fiber bundle for simultaneous PET-MR imaging. *Phys Med Biol.* 2012;57:3869–3883.
19. Yamamoto S, Watabe T, Watabe H, et al. Simultaneous imaging using Si-PM-based PET and MRI for development of an integrated PET/MRI system. *Phys Med Biol.* 2012;57:N1–N13.
20. Hong KJ, Choi Y, Jung JH, et al. A prototype MR insertable brain PET using tileable GAPD arrays. *Med Phys.* 2013;40:042503.
21. Zaidi H, Ojha N, Morich M, et al. Design and performance evaluation of a whole-body Ingenuity TF PET-MRI system. *Phys Med Biol.* 2011;56:3091–3106.
22. Kolb A, Wehrl HF, Hofmann M, et al. Technical performance evaluation of a human brain PET/MRI system. *Eur Radiol.* 2012;22:1776–1788.
23. Shah NJ, Oros-Peusquens A-M, Arrubla J, et al. Advances in multimodal neuroimaging: hybrid MR-PET and MR-PET-EEG at 3 T and 9.4 T. *J Magn Reson.* 2013;229:101–115.
24. Delso G, Fürst S, Jakoby B, et al. Performance measurements of the Siemens mMR integrated whole-body PET/MR scanner. *J Nucl Med.* 2011;52:1914–1922.
25. Levin C, Glover G, Deller T, McDaniel D, Peterson W, Maramraju SH. Prototype time-of-flight PET ring integrated with a 3T MRI system for simultaneous whole-body PET/MR imaging [abstract]. *J Nucl Med.* 2013;54(suppl 2):45P.
